# Supplementary material
Source: Springer Nature journal article supplement (https://www.springermedizin.de/resource/supplementary/12888_2013_1501_MOESM1_ESM.pdf/9480586)
Supplement: MOESM1 [file 9480586]

| TOC                                         | Barriers                                                                                                                                                                                                                                                                                                                                                                                                                                                                                                                                                                                                         | Recommendations                                                                                                                                                                                                                                                                                                                                                                                                                                                                                                                                                                              |
|---------------------------------------------|------------------------------------------------------------------------------------------------------------------------------------------------------------------------------------------------------------------------------------------------------------------------------------------------------------------------------------------------------------------------------------------------------------------------------------------------------------------------------------------------------------------------------------------------------------------------------------------------------------------|----------------------------------------------------------------------------------------------------------------------------------------------------------------------------------------------------------------------------------------------------------------------------------------------------------------------------------------------------------------------------------------------------------------------------------------------------------------------------------------------------------------------------------------------------------------------------------------------|
| Coordination and planning                   | <p><b>HMIS</b> program cannot be incorporated into District Level Health Information System until it is expanded nation-wide</p> <p><b>Lack of political buy-in for country-wide expansion</b> as mental health is not MDG, and due to lack of budget</p>                                                                                                                                                                                                                                                                                                                                                        | <p><b>Coordinate a mutual plan with both ministries</b> to discuss policy on prescription of psychotropic drugs</p> <p><b>Increase Budget</b> from tobacco health tax and invest returns in mental health</p>                                                                                                                                                                                                                                                                                                                                                                                |
| Motivated and trained staff (task-shifting) | <p><b>Program acceptance.</b> Health workers can only dedicate time to mental health care if mandated by the government</p> <p><b>Shortage of human resources</b> due to posting policy and NGO staff recruitment resulting in frequent turnover</p> <p><b>Status of task sharing.</b> Health workers need financial compensation and opportunities for professional development. Also, they need to be mandated to prescribe medicines, refer clients and receive legal protection for malpractice</p> <p><b>Training</b> success depends on provision of allowances and incorporating exposure to patients</p> | <p><b>Program integration</b> to make the plan and reporting part of existing government system</p> <p><b>Human resource</b> recommendations including appointing separate mental health staff and change positing policy</p> <p><b>For task sharing to work</b> compensation is essential. For lesser paid staff financial reimbursements are recommended, for others official (MoH) certification and legal mandate for the work can be considered.</p> <p><b>Training implementation</b> to be staggered to prevent staff shortage and to include onsite training at mental hospitals</p> |
| Motivated community members                 | <p><b>Community health volunteers' work burden</b> as this cadre is over-used by multiple health initiatives; financial incentives are required</p>                                                                                                                                                                                                                                                                                                                                                                                                                                                              | <p><b>Financial incentives for community health volunteers</b> to be arranged through a pension funds or for compensation-per-referral</p>                                                                                                                                                                                                                                                                                                                                                                                                                                                   |
| Community                                   | <p><b>Limited sensitivity</b> due to lack of mental health</p>                                                                                                                                                                                                                                                                                                                                                                                                                                                                                                                                                   | <p><b>Activities and resources</b> include mass</p>                                                                                                                                                                                                                                                                                                                                                                                                                                                                                                                                          |

|                                 |                                                                                                                                                                                                                                                                                                     |                                                                                                                                                                                                                                                                                                                                                                                                                                                                                                          |
|---------------------------------|-----------------------------------------------------------------------------------------------------------------------------------------------------------------------------------------------------------------------------------------------------------------------------------------------------|----------------------------------------------------------------------------------------------------------------------------------------------------------------------------------------------------------------------------------------------------------------------------------------------------------------------------------------------------------------------------------------------------------------------------------------------------------------------------------------------------------|
| identification                  | <p>literacy and the immediate ‘invisibility’ of many symptoms</p> <p><b>Conflicting roles and responsibilities:</b> Family members are relied upon to detect problems, at the same time family members’ reactions (i.e. imposed burden and shame) are a primary cause for hiding mental illness</p> | <p>sensitization(street dramas) about mental illness and training through community groups</p>                                                                                                                                                                                                                                                                                                                                                                                                           |
| Community awareness             | <p><b>Lack of awareness</b> permeates <i>all</i> sections of society and castes (regardless of literacy level)</p> <p><b>Resistance to education.</b> Stigma reduces receptiveness to campaigns about mental illness.</p>                                                                           | <p><b>Strategies for awareness-raising:</b> Public awareness-raising for information about services and symptoms, and private strategies for providing deeper understanding.</p>                                                                                                                                                                                                                                                                                                                         |
| Attitudes towards mental health | <p><b>Emotionally charged attitudes</b> including a combination of denial and hatred. Awareness of detrimental effect of stigmatization does not necessarily result in less collective negative emotional responses</p>                                                                             | <p><b>‘Bottom-up’ vs ‘top-down’ strategies</b> include grass-roots activity such as peer education, as well as laws and policy against discrimination.</p> <p><b>Reducing stigma;</b> reducing the dichotomy between treatments for the mind and body, and by using celebrities to promote treatment</p> <p><b>Beyond awareness-raising:</b> Awareness does not produce positive attitudes <i>per se</i>, it might increase negative emotions. In-depth education is needed alongside sensitization.</p> |
| Demand for services             | <p><b>Social and emotional factors</b> (humiliation, guilt, low self-esteem, shyness) accompany the social burden of seeking help.</p> <p><b>Unawareness</b> that health centers exist and a lack</p>                                                                                               | <p><b>Improve confidentiality</b> by training health workers in trust-building with patients and protecting the family status. Confidential space for mental health consultations is needed.</p>                                                                                                                                                                                                                                                                                                         |

|                                        |                                                                                                                                                                                                                                                                                                                                                                                                                                                                                                                                                                                                                                                                                    |                                                                                                                                                                                                                                                                                                                                                                                                                                                                                                                                                                                                                                 |
|----------------------------------------|------------------------------------------------------------------------------------------------------------------------------------------------------------------------------------------------------------------------------------------------------------------------------------------------------------------------------------------------------------------------------------------------------------------------------------------------------------------------------------------------------------------------------------------------------------------------------------------------------------------------------------------------------------------------------------|---------------------------------------------------------------------------------------------------------------------------------------------------------------------------------------------------------------------------------------------------------------------------------------------------------------------------------------------------------------------------------------------------------------------------------------------------------------------------------------------------------------------------------------------------------------------------------------------------------------------------------|
|                                        | of clarity about whether treatments are cost free                                                                                                                                                                                                                                                                                                                                                                                                                                                                                                                                                                                                                                  | <b>Use mass media channels</b> to communicate information about services and create clarity on costs and available support.                                                                                                                                                                                                                                                                                                                                                                                                                                                                                                     |
|                                        | <b>Poor reputation of services</b> due to lack of privacy and prevalence of abuse.                                                                                                                                                                                                                                                                                                                                                                                                                                                                                                                                                                                                 |                                                                                                                                                                                                                                                                                                                                                                                                                                                                                                                                                                                                                                 |
| Treatment package/<br>service delivery | <b>Consultations jeopardized</b> due to lack of gender matched consultants; lack of privacy; safety concerns due to fear of violent patients; lack of confidence in competencies of health staff<br><br><b>Inadequate infrastructure</b> is characterized by a poor referral system, resources and options.                                                                                                                                                                                                                                                                                                                                                                        | <b>Control distribution</b> of psychotropic medications to prevent drug abuse<br><br><b>Improved referrals</b> by having psychiatrists attending training to meet health workers that will refer to them; and by creating additional ‘mental health beds’ in existing hospitals                                                                                                                                                                                                                                                                                                                                                 |
| Recovery and treatment adherence       | <b>Stigma, discrimination and abuse</b> cause exclusion of mentally ill people from social functions, religious rituals, and income generating organizations, which negatively influences their chances of recovery<br><br><b>Patients drop out of treatment due to</b> (a) lack of money or family support for treatment or transportation; (b) offensive behavior of health workers; (c) received treatment does not meet expectations, and (d) being talked into traditional healing<br><br><b>Patients discontinue medications</b> due to associated cost, side effects, (absence of) symptom reduction, as well as beliefs that medicine use is indefinite and makes one weak | <b>Raise Awareness</b> that mental illness is treatable through community sensitization<br><br><b>Improve social standing of clients</b> through vocational training and income generating<br><br><b>Re-integrate clients into community</b> by engaging them in community activities using volunteers.<br><br><b>Treatment adherence can be improved</b> by providing treatment free of charge and by involving community and peer groups for motivation, education, and frequent follow-up and home visits. <b>Build trust with health care workers</b> by maintaining confidentiality and providing sensitive & quality care |
| Supervision and quality                | <b>Under qualified supervisors</b> are not taken seriously by service providers                                                                                                                                                                                                                                                                                                                                                                                                                                                                                                                                                                                                    | <b>Create a post for District Mental Health Coordinator</b> to prevent negligence of, and                                                                                                                                                                                                                                                                                                                                                                                                                                                                                                                                       |

|                    |                                                                                                                                                                                                                                                                                          |                                                                                                                                                                                                                                                           |
|--------------------|------------------------------------------------------------------------------------------------------------------------------------------------------------------------------------------------------------------------------------------------------------------------------------------|-----------------------------------------------------------------------------------------------------------------------------------------------------------------------------------------------------------------------------------------------------------|
| control            | <p><b>Supervision is irregular or non-existent</b>, in part due to lack of incentives</p> <p><b>Threats, disrespect, abuse and punishment</b> of health workers during supervision</p>                                                                                                   | <p>assure funds for, supervision, as well as monitor the supervisors(observation of trained health workers, visiting patients, reviewing records)</p> <p><b>Quality Control</b> can be ensured by having coordinator and supervisors report outcomes.</p> |
| Family involvement | <p><b>Ambivalence</b> among family member, as many know that giving support is needed, yet feeling hostile towards dysfunctional family members</p> <p><b>Lack of support for married women</b> due to actual or feared rejection from in-law families if mental illness is revealed</p> | <p><b>Protecting family status</b> by support services protecting the family (as well as the patient) from stigmatization. The influence of heads of families should be used to encourage help-seeking</p>                                                |
| Community support  | <p><b>Lack of social support for access</b>, as clients fail to seek or maintain treatment if accompaniment and transportation is unavailable</p>                                                                                                                                        | <p><b>Community members or friends</b> play an essential role by accompanying help seekers, including, but not limited to, arranging logistics</p>                                                                                                        |
| Drug procurement   | <p><b>Medication not on the essential drug list</b> causes concerns over budget, maintenance of government supply and expired medicines</p>                                                                                                                                              | <p><b>Alternatives to the essential drug list</b> include health facilities partnering with local pharmacies to purchase and stock psychotropic drugs</p>                                                                                                 |
| Referral care      | <p><b>Potential for confusion and stress</b> if advice from health centers contradicts traditional healers</p> <p><b>Lack of quality from hospitals</b>, despite being perceived as more desirable than health posts</p>                                                                 | <p><b>Referrals from traditional healers</b> are an essential pathway to care for the poor, through referral to health facilities</p>                                                                                                                     |

Note: MoH Ministry of Health; TOC Theory of Change; HMIS Health Management Information System; MDG Millennium Development Goals
